# Supplementary material
Source: PubMed Central journal article supplement (PMC3390875)
Supplement: 1200250109_pnas.201200250SI.pdf [file 1200250109_pnas.201200250SI.pdf]

# Supporting Information

Lian et al. 10.1073/pnas.1200250109

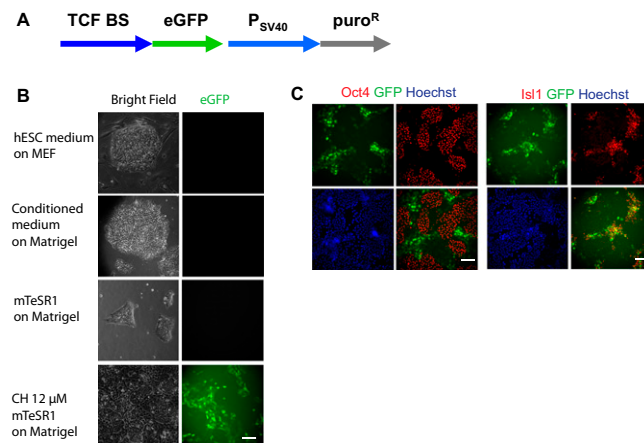

**Fig. 51.** Activation of Wnt/ $\beta$ -catenin signaling by glycogen synthase kinase 3 (Gsk3) inhibitors treatment induces differentiation in hPSCs. (A) Schematic of the 7TGP lentiviral promoter-reporter construct. "TCF BS" represents seven repeats of T-cell factor/lymphoid enhancer-binding factor consensus promoter binding sites. (B) H9 7TGP cells were cultured in hESC medium on MEF feeders or in conditioned medium, mTeSR1, or mTeSR1 plus 12  $\mu$ M CHIR99021 (CH) on Matrigel. GFP expression was detected by immunofluorescent microscopy. (Scale bar, 50  $\mu$ m.) (C) 19-9-11 7TGP cells were cultured in mTeSR1 plus 12  $\mu$ M CH on Matrigel. GFP localization and immunostaining of Oct4 and Isl1 was performed 3 d after the addition of CH. (Scale bars, 50  $\mu$ m.)

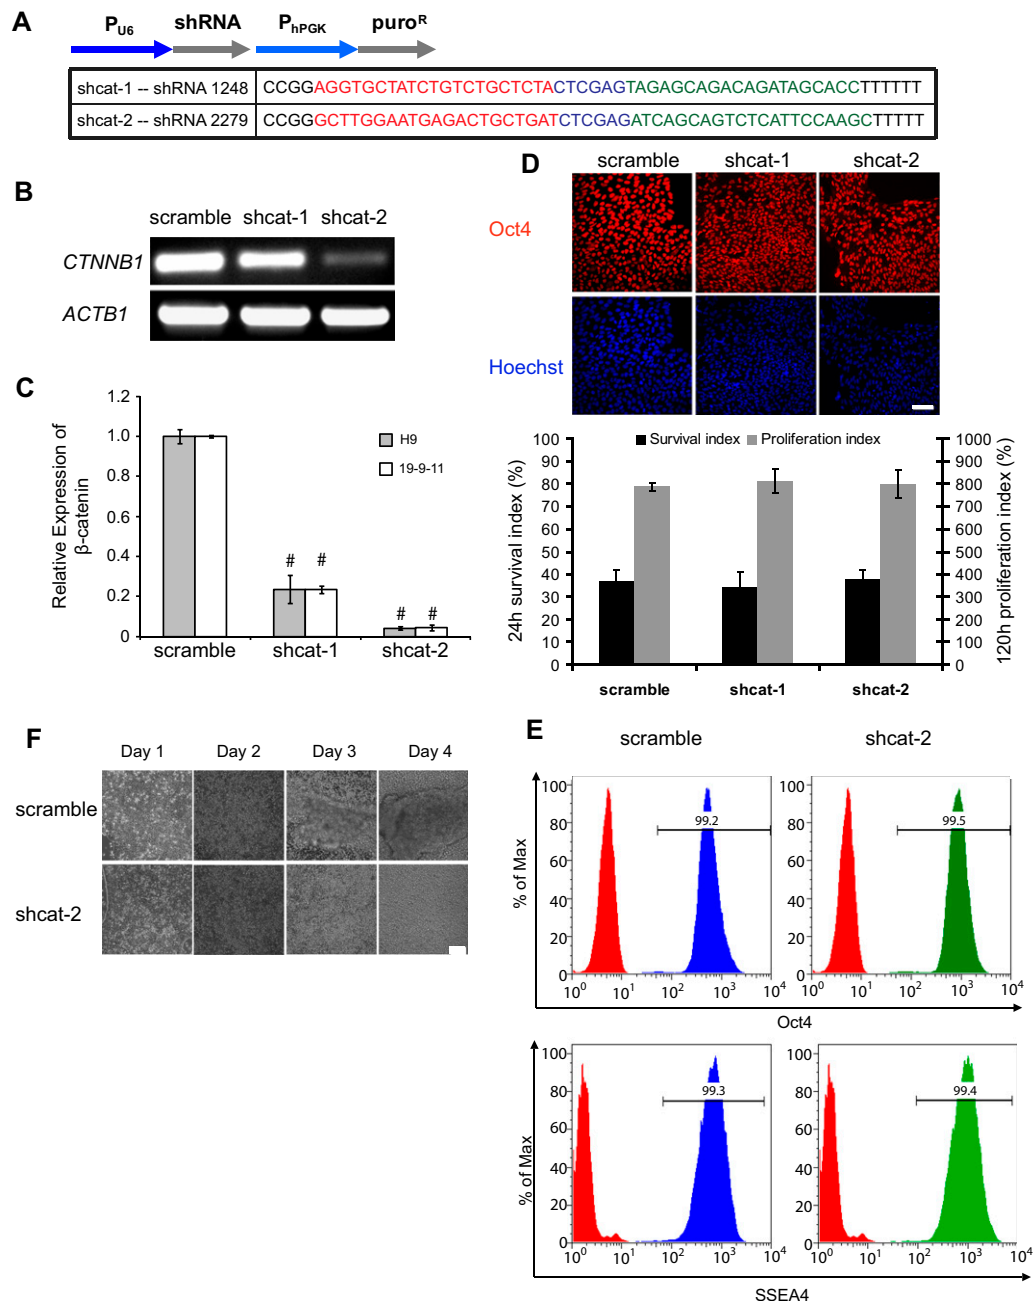

**Fig. S2.** Differentiation induced by treatment with Gsk3 inhibitors in hPSCs is  $\beta$ -catenin dependent. (A) Schematic of construct for constitutive knockdown of  $\beta$ -catenin expression and shRNA sequences targeting  $\beta$ -catenin.  $P_{U6}$  and  $P_{hPGK}$  are human U6 and human phosphoglycerate kinase-1 promoters, respectively. Red and green sequences are forward and reverse shRNA sequences of  $\beta$ -catenin, respectively; the blue sequence represents the loop sequence. (B) H9  $\beta$ -catenin knockdown and scramble cell lines were cultured in mTeSR1, and expression of  $\beta$ -catenin was analyzed by RT-PCR. (C) Quantitative RT-PCR gene-expression analysis of  $\beta$ -catenin and  $\beta$ -actin for scramble and  $\beta$ -catenin knockdown lines in H9 and 19-9-11 cells.  $^{\#}P < 0.005$ , shcat-1 versus scramble and shcat-2 versus scramble (Student's *t* test). (D) (Upper) H9 scramble, shcat-1, and shcat-2 cells were cultured in mTeSR1 on Matrigel for 3 d and immunostained for Oct4. (Scale bar, 50  $\mu$ m.) (Lower) Three hundred thousand H9 scramble, shcat-1, and shcat-2 cells were seeded in one well of a six-well plate coated with Matrigel, cultured with mTeSR1 medium, and counted 120 h later. The survival index and proliferation index are defined as the cell numbers at a 24 h and 120 h, respectively, normalized to the number of input cells. (E) 19-9-11 shcat-2 and scramble lines were cultured in mTeSR1 on Matrigel for 3 d, and flow cytometry for Oct4 and SSEA4 was performed. The blue (scramble) and green (shcat-2) histograms represent Oct4 or SSEA4 expression, and the red histogram is an isotype control. (F) 19-9-11 shcat-2 and scramble cells were cultured on Matrigel in mTeSR1 containing 12  $\mu$ M CH for 4 d, and cell morphology was assessed by phase-contrast imaging. (Scale bar, 50  $\mu$ m.)

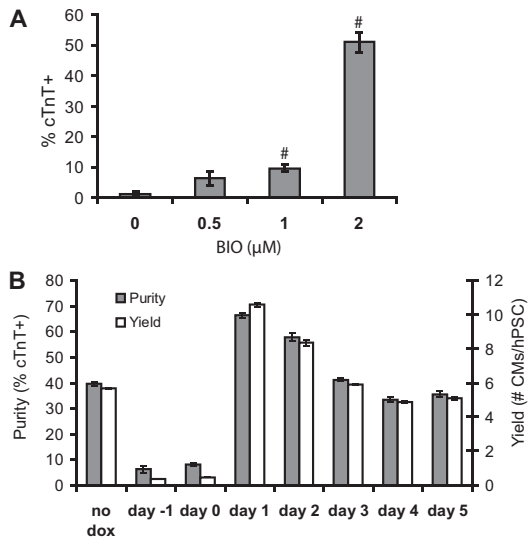

**Fig. S3.** Temporal regulation of Wnt/β-catenin signaling synergistically enhances cardiac differentiation with other signaling growth factors. *(A)* IMR90C4 cells were cultured in mTeSR1 containing different concentrations of 6-bromoindirubin-3'-oxime (BIO). Differentiation was induced by 100 ng/mL activin A at day 0 and 5 ng/mL bone morphogenic factor 4 (BMP4) at day 1 in RPMI/B27-insulin medium. Fifteen days after addition of activin A, the percentage of cells expressing cardiac troponin T (cTnT) was quantified by flow cytometry.  $^{\#}P < 0.005$ , each point versus no BIO (Student's *t* test). *(B)* 19-9-11 ishcat-2 cells were cultured in mTeSR1 and treated with BIO before being exposed to 100 ng/mL activin A at day 0 and 5 ng/mL BMP4 at day 1, with the addition of 2 μg/mL doxycycline (dox) at the indicated times. Fifteen days after the initiation of differentiation, cells were counted and analyzed for cTnT expression by flow cytometry. Error bars represent SEM of three independent experiments.  $^{\#}P < 0.005$ , each time point versus no dox (Student's *t* test).

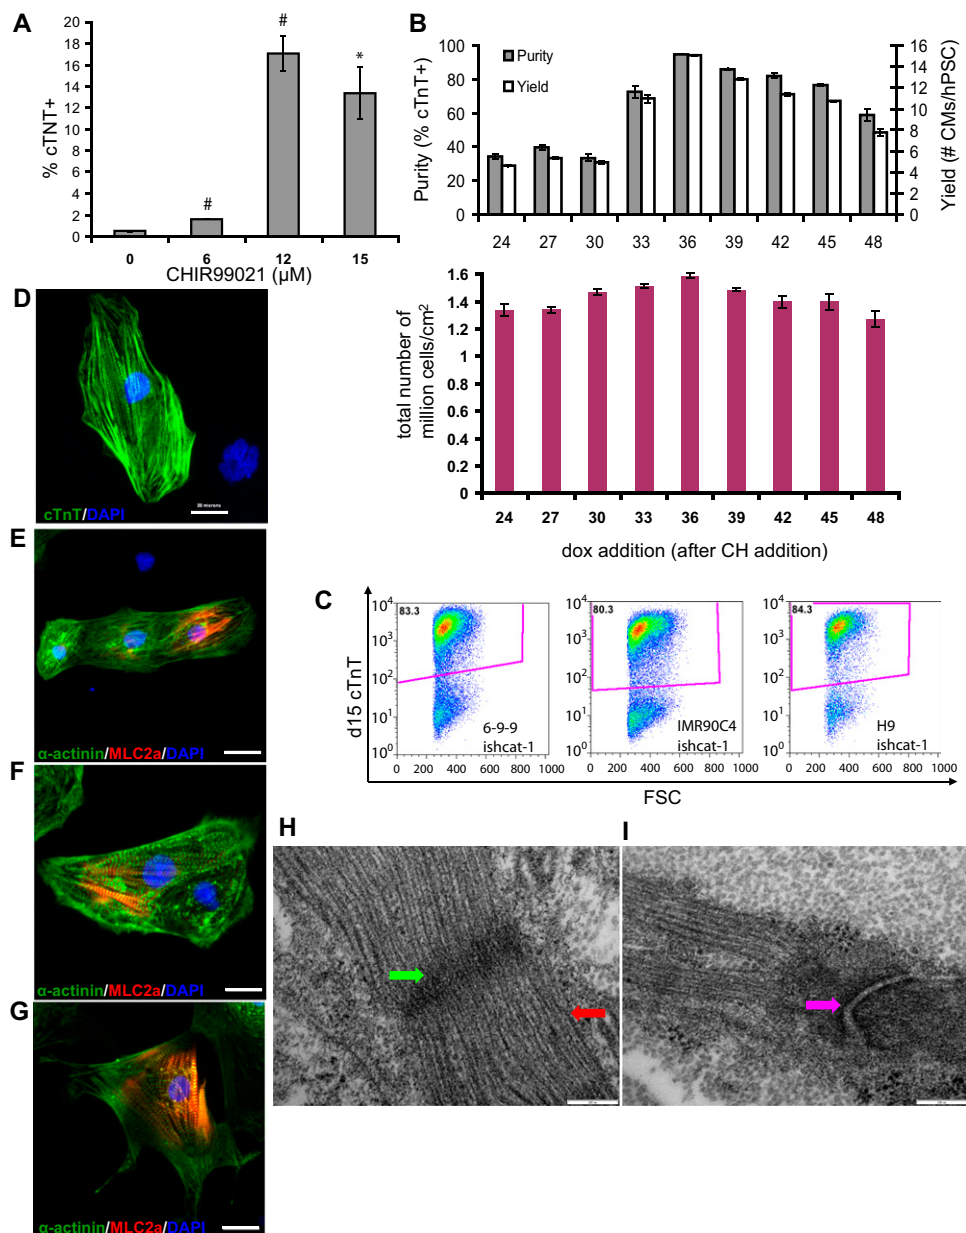

**Fig. 54.** Modulation of regulatory elements in Wnt signaling is sufficient to induce robust cardiac differentiation in hPSCs. (*A*) 19-9-11 ishcat-1 cells were treated with different concentrations of CH in RPMI/B27-insulin for 24 h, and then the medium was changed to RPMI/B27-insulin at day 1. Starting from day 7, cells were cultured in RPMI/B27. Flow cytometry of cTnT was performed at day 15 after the addition of CH. Error bars represent the SEM of three independent experiments.  $*P < 0.05$ ;  $\#P < 0.005$ , each point versus no CH (Student's *t* test). (*B*) 19-9-11 ishcat-1 cells were cultured in mTeSR1 before exposure to 12  $\mu\text{M}$  CH in RPMI/B27-insulin for 24 h. Dox (2  $\mu\text{g}/\text{mL}$ ) was added at different time points following CH addition. Cell counting and flow cytometry of cTnT were performed at day 15 after the addition of CH. Error bars represent the SEM of three independent experiments. (*C*) Three additional hPSC lines (IMR90C4, 6-9-9, and H9) transduced with inducible  $\beta$ -catenin shRNA construct ishcat-1 cells were cultured in mTeSR1 and treated with 12  $\mu\text{M}$  CH followed by the addition of 2  $\mu\text{g}/\text{mL}$  dox 36 h later. Flow cytometry of cells expressing cTnT was performed 15 d following CH addition. (*D-G*) Immunostaining of day 30 cardiomyocytes generated from (*D*) 19-9-11 ishcat-1, (*E*) IMR90C4 ishcat-1, (*F*) 6-9-9 ishcat-1, and (*G*) H9 ishcat-1 cells cultured in mTeSR1 and treated with the addition of 12  $\mu\text{M}$  CH and 2  $\mu\text{g}/\text{mL}$  dox 36 h later. Cells were immunostained for cTnT,  $\alpha$ -actinin, and MLC2a to show sarcomere structure. (Scale bars, 20  $\mu\text{m}$ .) (*H* and *I*) Transmission electron microscopic images of beating clusters derived from 19-9-11 ishcat-1 cells following culture in mTeSR1 and treated with the addition of 12  $\mu\text{M}$  CH and 2  $\mu\text{g}/\text{mL}$  dox 36 h later. (*H*) Myofibrils (red arrow) with Z-bands (green arrow). (*I*) Intercalated disks with desmosomes (pink arrowhead). (Scale bars, 200 nm.)

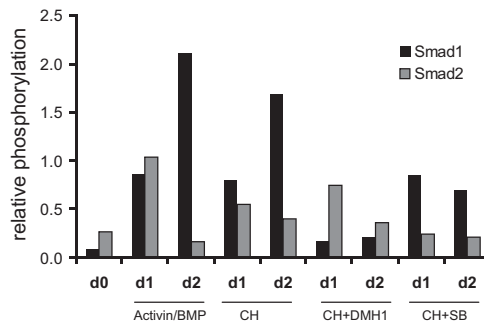

**Fig. 55.** Induction of TGF- $\beta$  superfamily signaling by Gsk3 inhibitors. 19-9-11 *ishcat-1* cells cultured in mTeSR1 were treated with 12  $\mu$ M CH, 12  $\mu$ M CH and 0.5–4  $\mu$ M SB431542, or 12  $\mu$ M CH and 0.2–1  $\mu$ M DMH1 for 24 h in RPMI/B27-insulin. Expression and phosphorylation of Smad proteins were assessed by Western blotting at different time points following CH treatment. The plot shows densitometry measurements of pSmad1/5 protein bands relative to total Smad1 and pSmad2 protein bands relative to total Smad2.

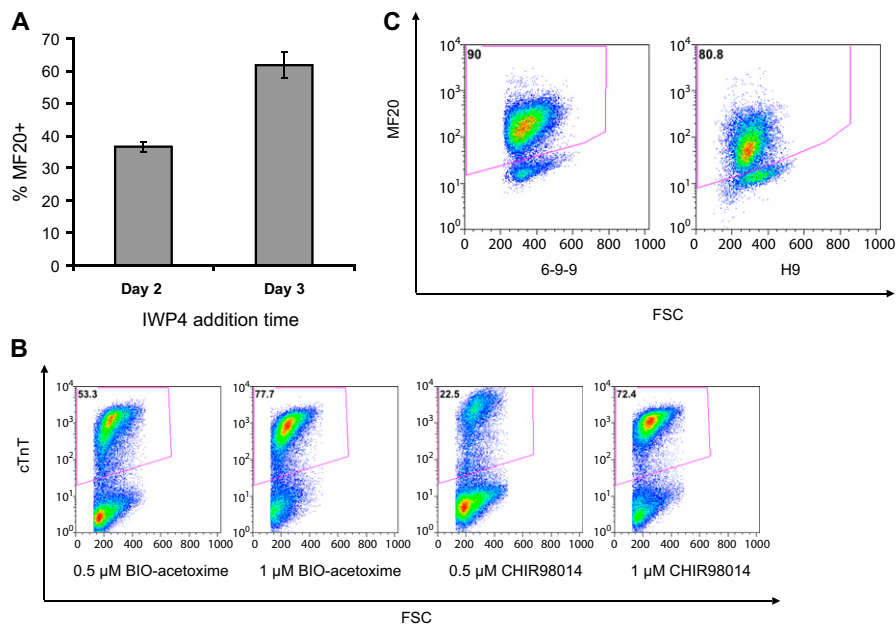

**Fig. 56.** Differentiation of hPSCs to cardiomyocytes in fully defined conditions with small molecules. (A) 19-9-11 cells were cultured in mTeSR1 on Matrigel and treated with 12  $\mu$ M CH followed by the addition of 1  $\mu$ M Inducer of Wnt production (IWP4) 2 or 3 d later. Flow cytometry for MF20 was performed at day 15. Error bars represent the SEM of three independent experiments. (B) 19-9-11 cells were cultured in mTeSR1 on Matrigel for 5 d before exposure to indicated concentrations of CH98014 or BIO-acetoxime (Tocris) at day 0 for 24 h, and IWP4 added at day 3, in RPMI/B27-insulin. At day 15, cTnT expression was assessed by flow cytometry. (C) 6-9-9 and H9 cells were cultured in mTeSR1 on Synthmax surface (Corning) and treated with 12  $\mu$ M CH followed by the addition of 5  $\mu$ M IWP4 3 d later. Flow cytometry for MF20 versus forward scatter (FSC) was performed at day 15.

**Table S1.** Percent of cTnT<sup>+</sup> cardiomyocytes present at day 15 after differentiation via embryoid body (EB) generation, directed differentiation using a Gsk3 inhibitor and shRNA knockdown of  $\beta$ -catenin, or directed differentiation using a Gsk3 inhibitor and inhibitors of Wnt production (IWPs)

| Cell line | EB methods (%)    | Gsk3 inhibitor + shRNA (%) | Gsk3 inhibitor + IWPs (%) |
|-----------|-------------------|----------------------------|---------------------------|
| H9        | 2.56 $\pm$ 0.97   | 85.03 $\pm$ 2.87           | 82.70 $\pm$ 2.33          |
| H13       | ND                | ND                         | 85.60 $\pm$ 1.78          |
| H14       | ND                | ND                         | 85.57 $\pm$ 4.17          |
| 19-9-11   | 0.019 $\pm$ 0.019 | 97.53 $\pm$ 0.50           | 95.20 $\pm$ 1.06          |
| 6-9-9     | 0.021 $\pm$ 0.01  | 86.30 $\pm$ 2.61           | 89.50 $\pm$ 2.10          |
| IMR90C4   | 0.74 $\pm$ 0.29   | 83.83 $\pm$ 3.12           | 91.03 $\pm$ 3.45          |

Data are presented as mean  $\pm$  SD of three independent experiments. ND, not determined.

**Table S2. Primers for RT-PCR and quantitative PCR**

| Genes                           | Sequences (5'–3')                                            | Size (bp)/ temperature m °C/no. of cycles |
|---------------------------------|--------------------------------------------------------------|-------------------------------------------|
| Primers for RT-PCR              |                                                              |                                           |
| <i>OCT4</i>                     | F: CAGTGCCCGAAACCCACAC<br>R: GGAGACCCAGCAGCCTCAA             | 161/58/30                                 |
| <i>NANOG</i>                    | F: CGAAGAATAGCAATGGTGTGACG<br>R: TTCCAAAGCAGCCTCCAAGTC       | 328/58/30                                 |
| <i>SOX2</i>                     | F: CAAGATGCACAACTCGGAGA<br>R: GTTCATGTGCGCGTAACTGT           | 300/58/30                                 |
| <i>CTNNB1</i>                   | F: GAATGAGACTGCTGATCTTGAC<br>R: CTGATTGCTGCACCTGGAG          | 250/58/30                                 |
| <i>GSC</i>                      | F: CGAGGAGAAAAGTGGAGGTCTGG<br>R: GCAGCGGTGTGCAAGAAA          | 261/55/35                                 |
| <i>MIXL1</i>                    | F: CAGAGTGGGAAATCCTTCCA<br>R: TGAGTCCAGCTTTGAACCAA           | 231/58/35                                 |
| <i>T</i>                        | F: CTCCTGAGACCCAGTTCA<br>R: CAGGGTTGGGTACCTGTAC              | 289/58/35                                 |
| <i>MSX1</i>                     | F: CCGAGAGGACCCGTGGATGC<br>R: GCCTCTGTAGTCTTTGCC             | 280/58/35                                 |
| <i>ISL1</i>                     | F: CACAAGCGTCTCGGGATT<br>R: AGTGCCAAGTCTCCGACA               | 202/58/40                                 |
| <i>WNT3A</i>                    | F: GCCCACTCGGATACTTC<br>R: GGCATGATCTCCACGTAGT               | 189/58/40                                 |
| <i>WNT8A</i>                    | F: ACAGGTCCCAAGGCCTATCT<br>R: ATCCTTTCCCAAATCCAC             | 335/58/40                                 |
| <i>NKX2-5</i>                   | F: GCGATTATGCAGCGTCAATGAGT<br>R: AACATAAATACGGGTGGGTGCGTG    | 220/58/35                                 |
| <i>GATA4</i>                    | F: TCCAAACGAGAAAACGGAAG<br>R: AAGACCAGGCTGTTCCAAGA           | 352/58/40                                 |
| <i>MEF2C</i>                    | F: AGCCCTGAGTCTGAGGACAA<br>R: GTGAGCCAGTGGCAATAGGT           | 195/58/40                                 |
| <i>TBX5</i>                     | F: GAAACCCAGCATAGGAGCTG<br>R: CAGCCTCACATCTTACCCTGT          | 191/58/40                                 |
| <i>TBX2</i>                     | F: AGTGGATGGCTAAGCCTGTG<br>R: ACGGGTTGTTGTCGATCTT            | 249/58/40                                 |
| <i>TNNI3</i>                    | F: CTGCAGATTGCAAAGCAAGA<br>R: CCTCCTTCTCACCTGCTT             | 379/58/40                                 |
| <i>TNNT2</i>                    | F: TTCACCAAAGATCTGCTCCTCGCT<br>R: TTATTACTGGTGTGGAGTGGGTGTGG | 165/58/40                                 |
| <i>MYL7</i>                     | F: GAGGAGAATGGCCAGCAGGAA<br>R: GCGAACATCTGCTCCACCTCA         | 449/58/35                                 |
| <i>MYL2</i>                     | F: ACATCATCACCCACGGAGAAGAGA<br>R: ATTGGAACATGGCCTCTGGATGGA   | 164/58/40                                 |
| <i>PLN</i>                      | F: ACAGCTGCCAAGGCTACCTA<br>R: GCTTTTGACGTGCTTGTGA            | 191/58/40                                 |
| <i>CD31</i>                     | F: GCTGACCCTTCTGCTCTGTT<br>R: TGAGAGGTGGTGTGCTGACATC         | 238/55/35                                 |
| <i>NODAL</i>                    | F: CTTCTGAGCCAACAAGAGG<br>R: AGGTGACCTGGGACAAAAGTG           | 197/58/40                                 |
| <i>BMP2</i>                     | F: TCAAGCCAAACACAAAACAGC<br>R: ACGTCTGAACAATGGCATGA          | 197/58/40                                 |
| <i>BMP4</i>                     | F: TGAGCCTTTCCAGCAAGTTT<br>R: CTTCCCCGTCTCAGGTATCA           | 180/58/40                                 |
| <i>NOGGIN</i>                   | F: TCGAACCCAGACCCTATC<br>R: TGTAACCTTCTCCGACGCTT             | 298/58/40                                 |
| <i>GAPDH</i>                    | F: CCCCTTCATTGACCTCAACTACA<br>R: TTGCTGATGATCTTGAGGCTGT      | 342/58/30                                 |
| <i>ACTB</i>                     | F: CCTGAACCCTAAGGCCAACCG<br>R: GCTCATAGCTTTCTCCAGGG          | 400/58/30                                 |
| <i>WT1</i>                      | F: GGGCAGAGCAACCACAGCACA<br>R: GCCACCGACAGCTGAAGGGC          | 469/58/35                                 |
| Primers for quantitative RT-PCR |                                                              |                                           |
| <i>GAPDH</i>                    | F: GTGGACCTGACCTGCCGTCT<br>R: GGAGGAGTGGGTGTCGCTGT           | 152                                       |
| <i>T</i>                        | F: AAGAAGGAAATGCAGCCTCA<br>R: TACTGCAGGTGTGAGCAAGG           | 101                                       |
| <i>CTNNB1</i>                   | F: CCCACTAATGTCCAGCGTTT<br>R: AACGCATGATAGCGTGTCTG           | 217                                       |

**Table S3. Antibodies for immunostaining (IS), Western blotting (WB), and flow cytometry (FC)**

| Antibody                     | Source                                                                | Application |
|------------------------------|-----------------------------------------------------------------------|-------------|
| Cardiac troponin T           | Lab Vision, mouse IgG1,<br>Clone: 13-11 ms-295-p1                     | 1:200 (FC)  |
| MF20                         | Developmental Studies Hybridoma Bank<br>Mouse IgG2b                   | 1:20 (FC)   |
| $\alpha$ -Actinin            | Sigma, mouse IgG1,<br>Clone: EA-53                                    | 1:500 (IS)  |
| Brachyury                    | R&D, Polyclonal Ab, Goat IgG<br>Clone: AF2085                         | 1:100 (FC)  |
| ISL1                         | DSHB, mouse IgG2b,<br>Clone: 39.4D5-s                                 | 1:20 (IS)   |
| MLC2a                        | Synaptic Systems, IgG2b<br>Cat: 311011, Clone: 56F5                   | 1:400 (FC)  |
| MLC2v                        | ProteinTech Group<br>Rabbit anti-MYL2, poly, PTG10906-1-AP            | 1:200 (FC)  |
| Oct-3/4                      | Santa Cruz, Rabbit IgG,<br>Clone: H-134, sc-9081                      | 1:40 (FC)   |
| Oct-3/4                      | Santa Cruz, Mouse IgG <sub>2b</sub><br>Clone: C-10 sc-5279            | 1:100 (IS)  |
| NKX2-5                       | Santa Cruz, Rabbit IgG,<br>Clone: H-114, sc-14033                     | 1:75 (IS)   |
| Phospho-Smad1/5 (Ser463/465) | Cell Signaling Technology, Rabbit mAb, 41D10<br>Cat: 9516S            | 1:500(WB)   |
| Phospho-Smad2 (Ser465/467)   | Cell Signaling Technology, Rabbit mAb, 138D4<br>3108S                 | 1:500(WB)   |
| Smad1                        | Cell Signaling Technology, Rabbit mAb, D59D7, 6944P                   | 1:1,000(WB) |
| Smad2/3                      | Cell Signaling Technology, Rabbit IgG, Cat: 5678S                     | 1:1,000(WB) |
| BMP2/4                       | Santa Cruz, mouse IgG2a, Clone H-1, sc-137087                         | 1:500(WB)   |
| $\beta$ -Actin               | Cell Signaling Technology,<br>Rabbit mAb (HRP Conjugate), 13E5, 5125S | 1:1,000(WB) |
| Goat anti-mouse IgG-HRP      | Santa Cruz, sc-2005                                                   | 1:1,000(WB) |

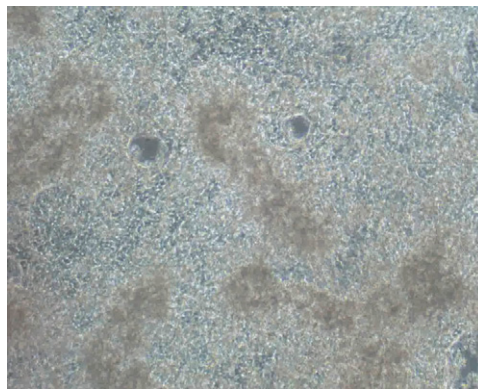

**Movie S1.** H9 cells were treated with 1  $\mu$ M BIO for 3 d before exposure to 100 ng/mL activin A at day 0 and 5 ng/mL BMP4 at day 1. Movie S1 shows day 15 cardiomyocytes.

[Movie S1](#)

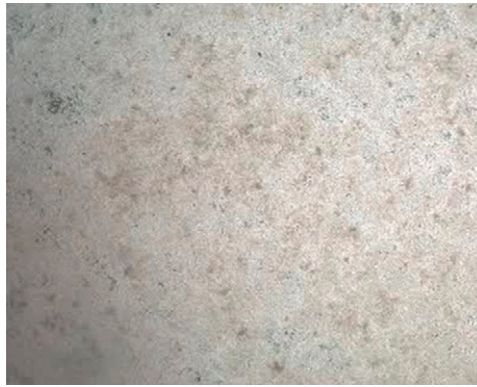

**Movie S2.** 19-9-11 ishcat-1 cells were treated with 12  $\mu\text{M}$  CH at day 0 and 2  $\mu\text{g}/\text{mL}$  dox at 36 h. Movie S2 shows relatively pure cardiomyocytes that contract as coordinated sheets in multiple independent wells ( $n = 9$  wells) demonstrating consistency and reproducibility.

[Movie S2](#)

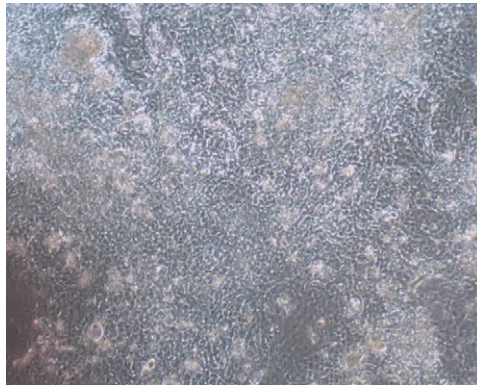

**Movie S3.** 19-9-11 ishcat-2 cells were differentiated as described in Movie S2. Cardiomyocytes maintained for 6 mo are shown.

[Movie S3](#)

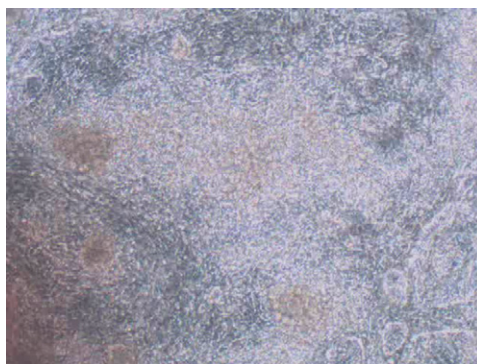

**Movie S4.** 19-9-11 cells were differentiated with 12  $\mu\text{M}$  CH at day 0 and 5  $\mu\text{M}$  IWP4 at day 3 on a Synthemax plate. Movie S4 shows day 15 cardiomyocytes.

[Movie S4](#)



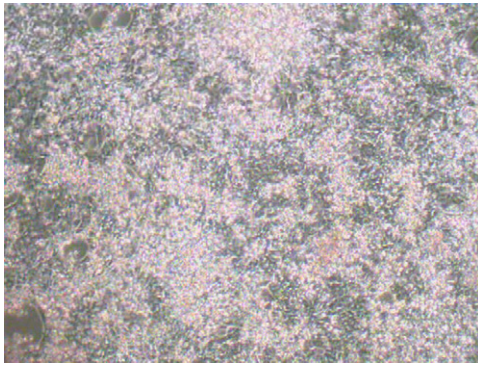

**Movie S5.** IMR90C4 cells were differentiated with 12  $\mu\text{M}$  CH at day 0 and 5  $\mu\text{M}$  IWP4 at day 3 on a Synthemax plate. Movie S5 shows day 15 cardiomyocytes at 10 $\times$  magnification.

[Movie S5](#)
